# Supplementary material for: Large-scale synthesis of uniformly loaded cobalt nanoparticles on alumina for efficient clean fuel production
Source: Royal Society of Chemistry journal article supplement (doi:10.1039/c6ra28177j), 2017-01-01
Supplement: c6ra28177j1.pdf [file c6ra28177j1.pdf]

## Electronic Supplementary Information

### Large-Scale Synthesis of Uniformly Loaded Cobalt Nanoparticles on Alumina for Efficient Clean Fuel Production

Ji Chan Park,\* Jae In Kwon, Shin Wook Kang, Dong Hyun Chun, Ho-Tae Lee, Heon Jung, Jung-II Yang\*

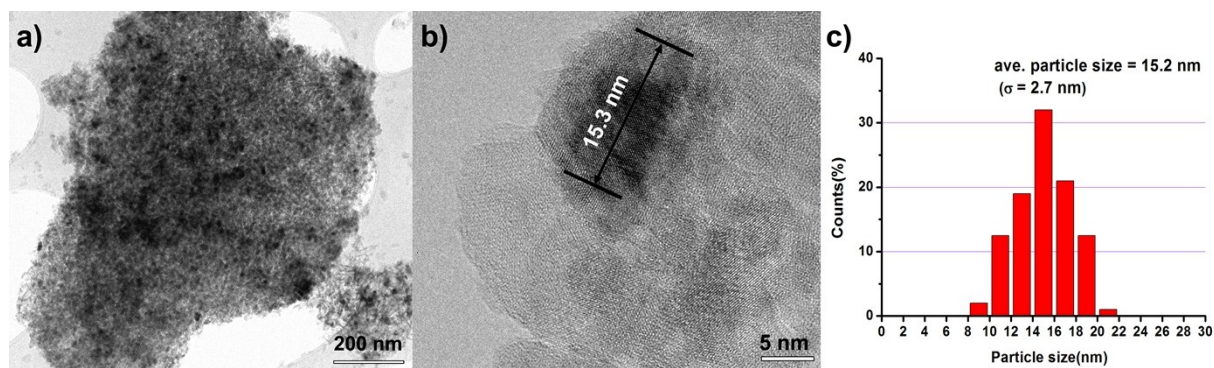

**Figure S1.** (a) Low-resolution and (b) high-resolution TEM images of Co/Al<sub>2</sub>O<sub>3</sub> nanocatalyst and (c) Co particle size distribution histogram. The average particle size was determined by counting more than 200 dots.

**Table S1.** Comparison of the CO conversion data and CTY values of Co catalysts.

| Catalyst                                                                    | Total CO conv.<br>(%) | CTY<br>( $\text{mol}_{\text{CO}} \cdot \text{g}_{\text{Co}}^{-1} \cdot \text{s}^{-1}$ ) | Ref.            |
|-----------------------------------------------------------------------------|-----------------------|-----------------------------------------------------------------------------------------|-----------------|
| Co/SBA-15 (Co: 15 wt%)                                                      | 22.3                  | $2.5 \times 10^{-5}$                                                                    | 1 <sup>a)</sup> |
| Co/MCF (Co: 15 wt%)                                                         | 49.4                  | $5.4 \times 10^{-5}$                                                                    |                 |
| CoPt/SiO <sub>2</sub><br>(Co: 15wt%, Pt: 0.5wt%)                            | 65.6                  | $3.6 \times 10^{-5}$                                                                    | 2 <sup>b)</sup> |
| Co <sub>2</sub> C                                                           | 80.4                  | $9.9 \times 10^{-5}$                                                                    | 3 <sup>c)</sup> |
| CoPt/Al <sub>2</sub> O <sub>3</sub><br>(Co:23wt%, Pt:0.05wt%)               | 75.3                  | $9.2 \times 10^{-5}$                                                                    |                 |
| Co/CNF<br>(Co: 13wt%)                                                       | 66                    | $4.4 \times 10^{-5}$                                                                    | 4 <sup>d)</sup> |
| Co/hollow Al <sub>2</sub> O <sub>3</sub> sphere<br>(Co: 10wt%)              | 84                    | Not available                                                                           | 5 <sup>e)</sup> |
| Co/Al <sub>2</sub> O <sub>3</sub> by impregnation<br>method<br>(Co: 20wt%)  | 43.9                  | $4.9 \times 10^{-5}$                                                                    | 6 <sup>f)</sup> |
| Co/Al <sub>2</sub> O <sub>3</sub> by precipitation<br>method<br>(Co: 20wt%) | 35.1                  | $3.4 \times 10^{-5}$                                                                    |                 |

Catalytic tests were carried out at a) T = 210°C, P = 10 bar, H<sub>2</sub>/CO ratio=2, GHSV=4.0 NL·g<sub>cat</sub><sup>-1</sup>·h<sup>-1</sup>, b) T = 210°C, P = 10 bar, H<sub>2</sub>/CO ratio=2, GHSV=2.0 NL·g<sub>cat</sub><sup>-1</sup>·h<sup>-1</sup>, c) T = 220°C, P = 20 bar, H<sub>2</sub>/CO ratio=2, GHSV=8.0 NL·g<sub>cat</sub><sup>-1</sup>·h<sup>-1</sup>, d) T = 210°C, P = 35 bar, H<sub>2</sub>/CO ratio=2, e) T = 260°C, P = 10 bar, GHSV=4.5 NL·g<sub>cat</sub><sup>-1</sup>·h<sup>-1</sup>, H<sub>2</sub>/CO ratio=2, f) T = 230°C, P = 10 bar, H<sub>2</sub>/CO ratio=2, GHSV=2.4 NL·g<sub>cat</sub><sup>-1</sup>·h<sup>-1</sup>.

## References)

1. L. Wei, Y. Zhao, Y. Zhang, C. Liu, J. Hong, H. Xiong and J. Li, *J. Catal.*, 2016, **340**, 205.
2. C. Liu, J. Lan, F. Sun, Y. Zhang, J. Li and J. Hong, *RSC Adv.*, 2016, **6**, 57701.
3. G. Kwak, D.-E. Kim, Y. T. Kim, H.-G. Park, S. C. Kang, K.-S. Ha, K.-W. Jun and Y.-J. Lee, *Catal. Sci. Technol.*, 2016, **6**, 4594.
4. G. L. Bezemer, J. H. Bitter, H. P. C. E. Kuipers, H. Oosterbeek, J. E. Holewijn, X. Xu, F. Kapteijn, A. J. van Dillen, K. P. de Jong, *J. Am. Chem. Soc.*, 2006, **128**, 3956.
5. J. Sun, C. Xing, H. Xu, F. Meng, Y. Yoneyama, N. Tsubaki, *J. Mater. Chem. A*, 2013, **1**, 5670.
6. K. Shimura, T. Miyazawa, T. Hanaoka, S. Hirata, *Appl. Catal. A.*, 2014, **475**, 1.

**Table S2.** Hydrocarbon product distribution data (wt%) of Co/Al<sub>2</sub>O<sub>3</sub> nanocatalyst.

| Temp. (°C) | Press. (bar) | Hydrocarbon distribution (wt%) |                                          |                                        |                                 |                                  |                  |
|------------|--------------|--------------------------------|------------------------------------------|----------------------------------------|---------------------------------|----------------------------------|------------------|
|            |              | CH <sub>4</sub>                | C <sub>2</sub> -C <sub>4</sub> paraffins | C <sub>2</sub> -C <sub>4</sub> olefins | C <sub>5</sub> -C <sub>12</sub> | C <sub>13</sub> -C <sub>18</sub> | C <sub>19+</sub> |
| 230        | 10           | 22.8                           | 6.8                                      | 4.6                                    | 26.7                            | 19.1                             | 20.0             |
|            | 20           | 17.9                           | 5.3                                      | 5.2                                    | 25.8                            | 18.7                             | 27.1             |
| 240        | 10           | 30.8                           | 11.3                                     | 3.0                                    | 27.8                            | 14.0                             | 13.1             |
|            | 20           | 20.4                           | 8.1                                      | 2.9                                    | 31.3                            | 17.8                             | 19.5             |
| 250        | 10           | 31.0                           | 13.2                                     | 3.5                                    | 33.1                            | 11.7                             | 7.5              |
|            | 20           | 22.8                           | 9.0                                      | 1.9                                    | 36.7                            | 15.6                             | 14.0             |
| 260        | 10           | 30.1                           | 12.8                                     | 3.5                                    | 36.5                            | 10.9                             | 6.2              |
|            | 20           | 29.7                           | 10.4                                     | 2.3                                    | 36.3                            | 13.3                             | 8.0              |

**Table S3.** Carbon chain growth probability ( $\alpha$ ) at 20 bar.

| Temperature (°C) | 230   | 240   | 250   | 260   |
|------------------|-------|-------|-------|-------|
| $\alpha$ value   | 0.885 | 0.864 | 0.848 | 0.785 |
